# Supplementary material for: Endophytic Colletotrichum Species from Aquatic Plants in Southwest China
Source: MDPI journal article supplement (doi:10.3390/jof8010087), 2022-01-16
Supplement: s1 [file s1]

**Table S1.** GenBank accession numbers of taxa used in phylogenetic analyses.

| Species name                              | Isolate No.    | GenBank Accession No. |          |          |          |          |
|-------------------------------------------|----------------|-----------------------|----------|----------|----------|----------|
|                                           |                | ITS                   | GAPDH    | CHS-1    | ACT      | TUB2     |
| <i>Colletotrichum abscissum</i>           | COAD 1877      | KP843126              | KP843129 | KP843132 | KP843141 | KP843135 |
| <i>Colletotrichum acutatum</i>            | CBS 112996     | JQ005776              | JQ948677 | JQ005797 | JQ005839 | JQ005860 |
| <i>Colletotrichum aenigma</i>             | ICMP 18608     | JX010244              | JX010044 | JX009774 | JX009443 | JX010389 |
| <i>Colletotrichum aeschynomenes</i>       | ICMP 17673     | JX010176              | JX009930 | JX009799 | JX009483 | JX010392 |
| <i>Colletotrichum agaves</i>              | CBS 118190     | DQ286221              | -        | -        | -        | -        |
| <i>Colletotrichum alatae</i>              | CBS 304.67     | JX010190              | JX009990 | JX009837 | JX009471 | JX010383 |
| <i>Colletotrichum alienum</i>             | ICMP 12071     | JX010251              | JX010028 | JX009882 | JX009572 | JX010411 |
| <i>Colletotrichum annellatum</i>          | CBS 129826     | JQ005222              | JQ005309 | JQ005396 | JQ005570 | JQ005656 |
| <i>Colletotrichum aotearoa</i>            | ICMP 18537     | JX010205              | JX010005 | JX009853 | JX009854 | JX010420 |
| <i>Colletotrichum areicola</i>            | CGMCC 3.19667  | MK914635              | MK945455 | MK935541 | MK935374 | MK935498 |
| <i>Colletotrichum artocarpicola</i>       | MFLUCC 18-1167 | MN415991              | MN435568 | MN435569 | MN435570 | MN435567 |
| <i>Colletotrichum asianum</i>             | ICMP 18580     | JX010196              | JX010053 | JX009867 | JX009584 | JX010406 |
| <i>Colletotrichum baiyuense</i>           | BY64           | OL842182              | OL981277 | OL981303 | OL981251 | -        |
| <i>Colletotrichum baiyuense</i>           | BY75           | OL842183              | OL981278 | OL981304 | OL981252 | -        |
| <i>Colletotrichum baiyuense</i>           | YMF 1.04941    | OL842184              | OL981279 | OL981305 | OL981253 | -        |
| <i>Colletotrichum beeveri</i>             | CBS 128527     | JQ005171              | JQ005258 | JQ005345 | JQ005519 | JQ005605 |
| <i>Colletotrichum boninense</i>           | CBS 123755     | JQ005153              | JQ005240 | JQ005327 | JQ005501 | JQ005588 |
| <i>Colletotrichum brasiliense</i>         | CBS 128501     | JQ005235              | JQ005322 | JQ005409 | JQ005583 | JQ005669 |
| <i>Colletotrichum brassicicola</i>        | CBS 101059     | JQ005172              | JQ005259 | JQ005346 | JQ005520 | JQ005606 |
| <i>Colletotrichum brevisporum</i>         | BCC 38876      | JN050238              | JN050227 | -        | JN050216 | JN050244 |
| <i>Colletotrichum cacao</i>               | CBS 119297     | MG600772              | MG600832 | MG600878 | MG600976 | MG601039 |
| <i>Colletotrichum camelliae</i>           | CGMCC:3.14925  | KJ955081              | KJ954782 | -        | KJ954363 | KJ955230 |
| <i>Colletotrichum camelliae-japonicae</i> | CGMCC3.18118   | KX853165              | KX893584 | -        | KX893576 | KX893580 |

|                                      |                |          |          |          |          |          |
|--------------------------------------|----------------|----------|----------|----------|----------|----------|
| <i>Colletotrichum casaense</i>       | BY97           | OL842178 | OL981273 | OL981299 | OL981247 | -        |
| <i>Colletotrichum casaense</i>       | KS17           | OL842179 | OL981274 | OL981300 | OL981248 | -        |
| <i>Colletotrichum casaense</i>       | YMF 1.04947    | OL842180 | OL981275 | OL981301 | OL981249 | -        |
| <i>Colletotrichum casaense</i>       | LT2            | OL842181 | OL981276 | OL981302 | OL981250 | -        |
| <i>Colletotrichum catinaense</i>     | CBS 142417     | KY856400 | KY856224 | KY856136 | KY855971 | KY856482 |
| <i>Colletotrichum cattleyicola</i>   | CBS 170.49     | MG600758 | MG600819 | MG600866 | MG600963 | MG601025 |
| <i>Colletotrichum caudatum</i>       | CBS 131602     | JX076860 | -        | -        | -        | -        |
| <i>Colletotrichum changpingense</i>  | MFLUCC 15-0022 | KP683152 | KP852469 | KP852449 | KP683093 | KP852490 |
| <i>Colletotrichum chlorophyti</i>    | IMI 103806     | GU227894 | GU228286 | GU228384 | GU227992 | GU228188 |
| <i>Colletotrichum chrysophillum</i>  | CMM4268        | KX094252 | KX094183 | KX094083 | KX093982 | KX094285 |
| <i>Colletotrichum ciggaro</i>        | ICMP 18539     | JX010230 | JX009966 | JX009800 | JX009523 | JX010434 |
| <i>Colletotrichum citricola</i>      | CBS 134228     | KC293576 | KC293736 | KC293792 | KC293616 | KC293656 |
| <i>Colletotrichum citrus-medicae</i> | GUCC 1554      | MN959910 | MT006331 | MT006328 | MT006325 | -        |
| <i>Colletotrichum clidemiae</i>      | ICMP 18658     | JX010265 | JX009989 | JX009877 | JX009537 | JX010438 |
| <i>Colletotrichum cliviicola</i>     | CBS 125375     | MG600733 | MG600795 | MG600850 | MG600939 | MG601000 |
| <i>Colletotrichum cobbittiense</i>   | BRIP 66219a    | MH087016 | MH094133 | MH094135 | MH094134 | MH094137 |
| <i>Colletotrichum coccodes</i>       | CBS 369.75     | HM171679 | HM171673 | JQ005796 | HM171667 | JQ005859 |
| <i>Colletotrichum colombiense</i>    | CBS 129818     | JQ005174 | JQ005261 | JQ005348 | JQ005522 | JQ005608 |
| <i>Colletotrichum condaoense</i>     | CBS 134299     | MH229914 | MH229920 | MH229926 | -        | MH229923 |
| <i>Colletotrichum conoides</i>       | CAUG17*        | KP890168 | KP890162 | KP890156 | KP890144 | KP890174 |
| <i>Colletotrichum constrictum</i>    | CBS 128504     | JQ005238 | JQ005325 | JQ005412 | JQ005586 | JQ005672 |
| <i>Colletotrichum cordylinicola</i>  | ICMP 18579     | JX010226 | JX009975 | JX009864 | HM470234 | JX010440 |
| <i>Colletotrichum costaricense</i>   | CBS 330.75     | JQ948180 | JQ948510 | JQ948841 | JQ949501 | JQ949831 |
| <i>Colletotrichum curcumae</i>       | IMI 288937     | GU227893 | GU228285 | GU228383 | GU227991 | GU228187 |
| <i>Colletotrichum cuscutae</i>       | IMI 304802     | JQ948195 | JQ948525 | JQ948856 | JQ949516 | JQ949846 |
| <i>Colletotrichum cymbidiicola</i>   | IMI 347923     | JQ005166 | JQ005253 | JQ005340 | JQ005514 | JQ005600 |

|                                       |                |          |          |          |          |          |
|---------------------------------------|----------------|----------|----------|----------|----------|----------|
| <i>Colletotrichum dacrycarpi</i>      | CBS 130241     | JQ005236 | JQ005323 | JQ005410 | JQ005584 | JQ005670 |
| <i>Colletotrichum dematium</i>        | CBS 125.25     | GU227819 | GU228211 | GU228309 | GU227917 | GU228113 |
| <i>Colletotrichum demersi</i>         | HF18           | OL842176 | OL981271 | OL981297 | OL981245 | OL981231 |
| <i>Colletotrichum demersi</i>         | YMF 1.04946    | OL842177 | OL981272 | OL981298 | OL981246 | OL981232 |
| <i>Colletotrichum destructivum</i>    | CBS 136228     | KM105207 | KM105561 | KM105277 | KM105417 | KM105487 |
| <i>Colletotrichum dianense</i>        | YMF 1.04943    | OL842189 | OL981284 | OL981310 | OL981258 | -        |
| <i>Colletotrichum doitungense</i>     | MFLUCC 14-0128 | MF448524 | MH049480 | -        | MH376385 | MH351277 |
| <i>Colletotrichum dracaenophilum</i>  | CBS 118199     | JX519222 | JX546707 | JX519230 | JX519238 | JX519247 |
| <i>Colletotrichum endophytica</i>     | MFLUCC 13-0418 | KC633854 | KC832854 | -        | KF306258 | -        |
| <i>Colletotrichum eryngiicola</i>     | MFLUCC 17-0318 | KY792726 | KY792723 | KY792720 | KY792717 | KY792729 |
| <i>Colletotrichum euphorbiae</i>      | CBS 134725     | KF777146 | KF77713  | KF777128 | KF777125 | KF777247 |
| <i>Colletotrichum feijoicola</i>      | CBS 144633     | MK876413 | MK876475 | -        | MK876466 | MK876507 |
| <i>Colletotrichum fioriniae</i>       | CBS 128517     | JQ948292 | JQ948622 | JQ948953 | JQ949613 | JQ949943 |
| <i>Colletotrichum fructicola</i>      | ICMP 18581     | JX010165 | JX010033 | JX009866 | FJ907426 | JX010405 |
| <i>Colletotrichum fructicola</i>      | YMF 1.04959    | OL842164 | OL981259 | OL981285 | OL981233 | -        |
| <i>Colletotrichum fructicola</i>      | Y79-6          | OL842165 | OL981260 | OL981286 | OL981234 | -        |
| <i>Colletotrichum fructivorum</i>     | CBS 133125     | JX145145 | -        | -        | -        | JX145196 |
| <i>Colletotrichum gigasporum</i>      | CBS 133266     | KF687715 | KF687822 | KF687761 | -        | KF687866 |
| <i>Colletotrichum gloeosporioides</i> | CBS 112999     | JQ005152 | JQ005239 | JQ005326 | JQ005500 | JQ005587 |
| <i>Colletotrichum graminicola</i>     | CBS 130836     | JQ005767 | -        | JQ005788 | JQ005830 | JQ005851 |
| <i>Colletotrichum grevilleae</i>      | CBS 132879     | KC297078 | KC297010 | KC296987 | KC296941 | KC297102 |
| <i>Colletotrichum grossum</i>         | CAUG7*         | KP890165 | KP890159 | KP890153 | KP890141 | KP890171 |
| <i>Colletotrichum guizhouensis</i>    | CGMCC 3.15112  | JX625158 | KC843536 | -        | KC843536 | JX625185 |
| <i>Colletotrichum hebeiense</i>       | MFLUCC13-0726  | KF156863 | KF377495 | KF289008 | KF377532 | KF288975 |
| <i>Colletotrichum hederiicola</i>     | MFLU 15-0689   | MN631384 | -        | MN635794 | MN635795 | -        |
| <i>Colletotrichum helleniense</i>     | CBS 142418     | KY856446 | KY856270 | KY856186 | KY856019 | KY856528 |

|                                     |                |          |          |          |          |          |
|-------------------------------------|----------------|----------|----------|----------|----------|----------|
| <i>Colletotrichum henanense</i>     | CGMCC 3.17354  | KJ955109 | KJ954810 | -        | KM023257 | KJ955257 |
| <i>Colletotrichum hippeastri</i>    | CBS 125376     | JQ005231 | JQ005318 | JQ005405 | JQ005579 | JQ005665 |
| <i>Colletotrichum horii</i>         | ICMP 10492     | GQ329690 | GQ329681 | JX009752 | JX009438 | JX010450 |
| <i>Colletotrichum hsienjenchang</i> | MAFF 243051    | AB738855 | -        | AB738846 | AB738845 | -        |
| <i>Colletotrichum hystricis</i>     | CBS 142411     | KY856450 | KY856274 | KY856190 | KY856023 | KY856532 |
| <i>Colletotrichum jasminigenum</i>  | MFLUCC 10-0273 | HM131513 | -        | -        | -        | HM153770 |
| <i>Colletotrichum jiangxiense</i>   | CGMCC 3.17363  | KJ955201 | KJ954902 | -        | KJ954471 | KJ955348 |
| <i>Colletotrichum jiangxiense</i>   | YMF 1.04949    | OL842166 | OL981261 | OL981287 | OL981235 | -        |
| <i>Colletotrichum jiangxiense</i>   | QC67           | OL842167 | OL981262 | OL981288 | OL981236 | -        |
| <i>Colletotrichum jiangxiense</i>   | HM6            | OL842168 | OL981263 | OL981289 | OL981237 | -        |
| <i>Colletotrichum kahawae</i>       | ICMP17816      | JX010231 | JX010012 | JX009813 | JX009452 | JX010444 |
| <i>Colletotrichum karstii</i>       | CORCG6         | HM585409 | HM585391 | HM582023 | HM581995 | HM585428 |
| <i>Colletotrichum karstii</i>       | YMF 1.04944    | OL842174 | OL981269 | OL981295 | OL981243 | OL981229 |
| <i>Colletotrichum liaoningense</i>  | CGMCC 3.17616  | KP890104 | KP890135 | KP890127 | KP890097 | KP890111 |
| <i>Colletotrichum lili</i>          | CBS 109214     | GU227810 | GU228202 | GU228300 | GU227908 | GU228104 |
| <i>Colletotrichum limetticola</i>   | CBS 114.14     | JQ948193 | JQ948523 | JQ948854 | JQ949514 | JQ949844 |
| <i>Colletotrichum limonicola</i>    | CBS 142410     | KY856472 | KY856296 | KY856213 | KY856045 | KY856554 |
| <i>Colletotrichum litangense</i>    | YMF 1.04948    | OL842185 | OL981280 | OL981306 | OL981254 | -        |
| <i>Colletotrichum litangense</i>    | LT31           | OL842186 | OL981281 | OL981307 | OL981255 | -        |
| <i>Colletotrichum litangense</i>    | LT76           | OL842187 | OL981282 | OL981308 | OL981256 | -        |
| <i>Colletotrichum lobatum</i>       | IMI 79736      | MG600768 | MG600828 | MG600874 | MG600972 | MG601035 |
| <i>Colletotrichum lupine</i>        | CBS 109225     | JQ948155 | JQ948485 | JQ948816 | JQ949476 | JQ949806 |
| <i>Colletotrichum magnum</i>        | CBS 519.97     | MG600769 | MG600829 | MG600875 | MG600973 | MG601036 |
| <i>Colletotrichum makassarens</i>   | CBS 143664a,   | MH728812 | MH728820 | MH805850 | MH781480 | MH846563 |
| <i>Colletotrichum melonis</i>       | CBS 159.84     | JQ948194 | JQ948524 | JQ948855 | JQ949515 | JQ949845 |
| <i>Colletotrichum merremiae</i>     | CBS 124955     | MG600765 | MG600825 | MG600872 | MG600969 | MG601032 |

|                                       |                |          |          |          |          |          |
|---------------------------------------|----------------|----------|----------|----------|----------|----------|
| <i>Colletotrichum metake</i>          | MAFF 244029    | AB738859 | -        | -        | -        | -        |
| <i>Colletotrichum musae</i>           | ICMP19119      | HQ596292 | HQ596299 | JX009896 | HQ596284 | HQ596280 |
| <i>Colletotrichum musicola</i>        | CBS 132885     | MG600736 | MG600798 | MG600853 | MG600942 | MG601003 |
| <i>Colletotrichum navitas</i>         | CBS 125086     | JQ005769 | -        | JQ005790 | JQ005832 | JQ005853 |
| <i>Colletotrichum nigrum</i>          | CBS 169.49     | JX546838 | JX546742 | JX546693 | JX546646 | JX546885 |
| <i>Colletotrichum novae-zelandiae</i> | CBS 128505     | JQ005228 | JQ005315 | JQ005402 | JQ005576 | JQ005662 |
| <i>Colletotrichum nupharicola</i>     | ICMP 18187     | JX010187 | JX009972 | JX009835 | JX009437 | JX010398 |
| <i>Colletotrichum ocimi</i>           | CBS 298.94     | KM105222 | KM105577 | KM105292 | KM105432 | KM105502 |
| <i>Colletotrichum okinawense</i>      | MAFF 240517    | MG600767 | MG600827 | -        | MG600971 | MG601034 |
| <i>Colletotrichum oncidii</i>         | CBS 129828     | JQ005169 | JQ005256 | JQ005343 | JQ005517 | JQ005603 |
| <i>Colletotrichum orbiculare</i>      | CBS 570.97     | KF178466 | KF178490 | KF178515 | KF178563 | KF178587 |
| <i>Colletotrichum orchidearum</i>     | CBS 135131     | MG600738 | MG600800 | MG600855 | MG600944 | MG601005 |
| <i>Colletotrichum orchidis</i>        | MFLUCC17-1302  | MK502144 | MK496857 | MK496855 | MK496853 | MK496859 |
| <i>Colletotrichum orchidophilum</i>   | CBS 632.80     | JQ948151 | JQ948481 | JQ948812 | JQ949472 | JQ949802 |
| <i>Colletotrichum panamense</i>       | CBS 125386     | MG600766 | MG600826 | MG600873 | MG600970 | MG601033 |
| <i>Colletotrichum pandanicola</i>     | MFLUCC 17-0571 | MG646967 | MG646934 | MG646931 | MG646938 | MG646926 |
| <i>Colletotrichum paranaense</i>      | CBS 134729     | KC204992 | KC205026 | KC205043 | KC205077 | KC205060 |
| <i>Colletotrichum parsonsiae</i>      | CBS 128525     | JQ005233 | JQ005320 | JQ005407 | JQ005581 | JQ005667 |
| <i>Colletotrichum perseae</i>         | CBS 141365     | KX620308 | KX620242 | -        | KX620145 | KX620341 |
| <i>Colletotrichum petchii</i>         | CBS 378.94     | JQ005223 | JQ005310 | JQ005397 | JQ005571 | JQ005657 |
| <i>Colletotrichum phaseolorum</i>     | CBS 158.36     | GU227897 | GU228289 | GU228387 | GU227995 | GU228191 |
| <i>Colletotrichum philoxeroidis</i>   | YMF 1.04945    | OL842188 | OL981283 | OL981309 | OL981257 | -        |
| <i>Colletotrichum phyllanthi</i>      | CBS 175.67     | JQ005221 | JQ005308 | JQ005395 | JQ005569 | JQ005655 |
| <i>Colletotrichum piperis</i>         | IMI 71397      | MG600760 | MG600820 | MG600867 | MG600964 | MG601027 |
| <i>Colletotrichum plurivorum</i>      | CBS 125474     | MG600718 | MG600781 | MG600841 | MG600925 | MG600985 |
| <i>Colletotrichum proteae</i>         | CBS 132882     | KC297079 | KC297009 | KC296986 | KC296940 | KC297101 |

|                                           |                |          |          |          |          |          |
|-------------------------------------------|----------------|----------|----------|----------|----------|----------|
| <i>Colletotrichum pseudoacutatum</i>      | CBS 436.77     | JQ948480 | JQ948811 | JQ949141 | JQ949801 | JQ950131 |
| <i>Colletotrichum pseudomajus</i>         | CBS 571.88     | KF687722 | KF687826 | KF687779 | KF687801 | KF687883 |
| <i>Colletotrichum pseudotheobromicola</i> | MFLUCC 18–1602 | MH817395 | MH853675 | MH853678 | MH853681 | MH853684 |
| <i>Colletotrichum psidii</i>              | CBS 145.29     | JX010219 | JX009967 | JX009901 | JX009515 | JX010443 |
| <i>Colletotrichum pyrifolia</i>           | CGMCC 3.18902  | MG748078 | MG747996 | MG747914 | MG747768 | MG748158 |
| <i>Colletotrichum queenslandicum</i>      | ICMP 1778      | JX010276 | JX009934 | JX009899 | JX009447 | JX010414 |
| <i>Colletotrichum radicans</i>            | CBS 529.93     | KF687719 | KF687825 | KF687762 | KF687785 | KF687869 |
| <i>Colletotrichum rhexiae</i>             | CBS 133134     | JX145128 | -        | -        | -        | JX145179 |
| <i>Colletotrichum rusci</i>               | CBS 119206     | GU227818 | GU228210 | GU228308 | GU227916 | GU228112 |
| <i>Colletotrichum salsolae</i>            | ICMP 19051     | JX010242 | JX009916 | JX009863 | JX009562 | JX010403 |
| <i>Colletotrichum siamense</i>            | ICMP 18578     | FJ972613 | FJ972575 | JX009865 | FJ907423 | FJ907438 |
| <i>Colletotrichum sidae</i>               | CBS 504.97     | KF178472 | KF178497 | KF178521 | KF178569 | KF178593 |
| <i>Colletotrichum sojae</i>               | ATCC 62257     | MG600749 | MG600810 | MG600860 | MG600954 | MG601016 |
| <i>Colletotrichum somersetense</i>        | CBS 131599     | JX076862 | -        | -        | -        | -        |
| <i>Colletotrichum spaethianum</i>         | CBS 167.49     | GU227807 | GU228199 | GU228297 | GU227905 | GU228101 |
| <i>Colletotrichum spicati</i>             | YMF 1.04942    | OL842171 | OL981266 | OL981292 | OL981240 | OL981226 |
| <i>Colletotrichum spicati</i>             | F6             | OL842172 | OL981267 | OL981293 | OL981241 | OL981227 |
| <i>Colletotrichum spinosum</i>            | CBS 515.97     | KF178474 | KF178498 | KF178523 | KF178571 | KF178595 |
| <i>Colletotrichum sydowii</i>             | CBS135819      | KY263783 | KY263785 | KY263787 | KY263791 | KY263793 |
| <i>Colletotrichum syzygiicola</i>         | MFLUCC 10-0624 | KF242094 | KF242156 | -        | KF157801 | KF254880 |
| <i>Colletotrichum tainanense</i>          | CBS 143666a    | MH728818 | MH728823 | MH805845 | MH781475 | MH846558 |
| <i>Colletotrichum tamarilloi</i>          | CBS 129814     | JQ948184 | JQ948514 | JQ948845 | JQ949505 | JQ949835 |
| <i>Colletotrichum temperatum</i>          | CBS 133122     | JX145159 | -        | -        | -        | JX145211 |
| <i>Colletotrichum tengchongense</i>       | YMF 1.04950    | OL842169 | OL981264 | OL981290 | OL981238 | -        |
| <i>Colletotrichum theobromicola</i>       | ICMP 18649     | JX010294 | JX010006 | JX009869 | JX009444 | JX010447 |
| <i>Colletotrichum ti</i>                  | ICMP 4832      | JX010269 | JX009952 | JX009898 | JX009520 | JX010442 |

|                                     |                |          |          |          |          |          |
|-------------------------------------|----------------|----------|----------|----------|----------|----------|
| <i>Colletotrichum torulosum</i>     | CBS 128544     | JQ005164 | JQ005251 | JQ005338 | JQ005512 | JQ005598 |
| <i>Colletotrichum trichellum</i>    | CBS 217.64     | GU227812 | GU228204 | GU228302 | GU227910 | GU228106 |
| <i>Colletotrichum tropicale</i>     | CBS 124949     | JX010264 | JX010007 | JX009870 | JX009489 | JX010407 |
| <i>Colletotrichum truncatum</i>     | CBS 151.35     | GU227862 | GU228254 | GU228352 | GU227960 | GU228156 |
| <i>Colletotrichum viniferum</i>     | GZAAS5.08601   | JN412804 | JN412798 | -        | JN412795 | JN412813 |
| <i>Colletotrichum vittalense</i>    | CBS 181.82     | MG600734 | MG600796 | MG600851 | MG600940 | MG601001 |
| <i>Colletotrichum vulgaris</i>      | YMF 1.04940    | OL842170 | OL981265 | OL981291 | OL981239 | -        |
| <i>Colletotrichum watphraense</i>   | MFLUCC 14-0123 | MF448523 | MH049479 | -        | MH376384 | MH351276 |
| <i>Colletotrichum wuxiense</i>      | CGMCC 3.17894  | KU251591 | KU252045 | KU251939 | KU251672 | KU252200 |
| <i>Colletotrichum wuxuhaiense</i>   | YMF 1.04951    | OL842173 | OL981268 | OL981294 | OL981242 | OL981228 |
| <i>Colletotrichum wuxuhaiense</i>   | F34            | OL842175 | OL981270 | OL981296 | OL981244 | OL981230 |
| <i>Colletotrichum xanthorrhoeae</i> | ICMP 17903     | JX010261 | JX009927 | JX009823 | JX009478 | JX010448 |
| <i>Colletotrichum yulongense</i>    | CFCC 50818     | MH751507 | MK108986 | MH793605 | MH777394 | MK108987 |
| <i>Colletotrichum yunnanense</i>    | CBS 13213      | JX546804 | JX546706 | JX519231 | JX519239 | JX519248 |
| <i>Monilochaetes infuscans</i>      | CBS 86996      | JQ005780 | JX546612 | JQ005801 | -        | JQ005864 |

---
